# Supplementary material for: Using Design of Experiments to Optimize a Screening Analytical Methodology Based on Solid-Phase Microextraction/Gas Chromatography for the Determination of Volatile Methylsiloxanes in Water
Source: MDPI journal article supplement (doi:10.3390/molecules26113429), 2021-06-05
Supplement: s1 [file s1]

## **Supporting Information**

### **Using Design of Experiments to optimize a screening analytical methodology based on Solid-Phase Microextraction/Gas Chromatography for the determination of volatile methylsiloxanes in water**

Fábio Bernardo<sup>1</sup>, Providencia González-Hernández<sup>2</sup>, Nuno Ratola<sup>1</sup>, Verónica Pino<sup>2,3</sup>, Arminda Alves<sup>1</sup>, Vera Homem<sup>1,\*</sup>

<sup>1</sup>LEPABE – Laboratory for Process Engineering, Environment, Biotechnology and Energy, Faculty of Engineering, University of Porto, Rua Dr. Roberto Frias, 4200-465 Porto, Portugal

<sup>2</sup>Departamento de Química, Unidad Departamental de Química Analítica, Universidad de La Laguna (ULL), La Laguna, Tenerife, 38206 Spain

<sup>3</sup>University Institute of Tropical Diseases and Public Health, Universidad de La Laguna (ULL), La Laguna, Tenerife, 38206 Spain

Number of Pages: 6

Number of Tables: 5

Number of Figures: 2

**Table S1.** Factors and values for the proposed central composite design

| <b>X<sub>i</sub></b> | <b>Factor</b>               | <b>-1.607<br/>(-α)</b> | <b>-1<br/>(-)</b> | <b>0</b> | <b>1<br/>(+)</b> | <b>1.607<br/>(+α)</b> | <b>Central Composite<br/>Design (CCD)</b>                                           |
|----------------------|-----------------------------|------------------------|-------------------|----------|------------------|-----------------------|-------------------------------------------------------------------------------------|
| <b>1</b>             | Ionic strength (%NaCl)      | 0                      | 5                 | 12       | 20               | 24                    | 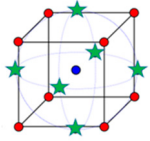 |
| <b>2</b>             | Extraction time (min)       | 3                      | 11                | 25       | 39               | 48                    |                                                                                     |
| <b>3</b>             | Desorption time (min)       | 1                      | 3                 | 6        | 10               | 12                    |                                                                                     |
| <b>4</b>             | Extraction temperature (°C) | 22                     | 33                | 51       | 69               | 80                    |                                                                                     |
| <b>5</b>             | Desorption temperature (°C) | 201                    | 210               | 225      | 240              | 249                   |                                                                                     |

**Table S2.** Proposed central composite design

| <b>Run</b> | <b>Pattern</b> | <b>X<sub>1</sub></b> | <b>X<sub>2</sub></b> | <b>X<sub>3</sub></b> | <b>X<sub>4</sub></b> | <b>X<sub>5</sub></b> |
|------------|----------------|----------------------|----------------------|----------------------|----------------------|----------------------|
| <b>1</b>   | 000(-α)0       | 12                   | 25                   | 6                    | 22                   | 225                  |
| <b>2</b>   | ++++           | 20                   | 39                   | 3                    | 33                   | 210                  |
| <b>3</b>   | ++---          | 20                   | 11                   | 10                   | 33                   | 210                  |
| <b>4</b>   | -----          | 5                    | 11                   | 3                    | 33                   | 210                  |
| <b>5</b>   | --++-          | 5                    | 39                   | 10                   | 33                   | 210                  |
| <b>6</b>   | +++--          | 20                   | 39                   | 10                   | 33                   | 240                  |
| <b>7</b>   | -++--          | 5                    | 39                   | 3                    | 33                   | 240                  |
| <b>8</b>   | +++++          | 20                   | 11                   | 3                    | 33                   | 240                  |
| <b>9</b>   | ---++          | 5                    | 11                   | 10                   | 33                   | 240                  |
| <b>10</b>  | 0000(-α)       | 12                   | 25                   | 6                    | 51                   | 201                  |
| <b>11</b>  | 00000          | 12                   | 25                   | 6                    | 51                   | 225                  |
| <b>12</b>  | 00000          | 12                   | 25                   | 6                    | 51                   | 225                  |
| <b>13</b>  | (-α)0000       | 0                    | 25                   | 6                    | 51                   | 225                  |
| <b>14</b>  | (+α)0000       | 24                   | 25                   | 6                    | 51                   | 225                  |
| <b>15</b>  | 00000          | 12                   | 25                   | 6                    | 51                   | 225                  |
| <b>16</b>  | 00000          | 12                   | 25                   | 6                    | 51                   | 225                  |
| <b>17</b>  | 00000          | 12                   | 25                   | 6                    | 51                   | 225                  |
| <b>18</b>  | 00(-α)00       | 12                   | 25                   | 1                    | 51                   | 225                  |
| <b>19</b>  | 00(+α)00       | 12                   | 25                   | 12                   | 51                   | 225                  |
| <b>20</b>  | 00000          | 12                   | 25                   | 6                    | 51                   | 225                  |
| <b>21</b>  | 0(-α)000       | 12                   | 3                    | 6                    | 51                   | 225                  |
| <b>22</b>  | 0(+α)000       | 12                   | 48                   | 6                    | 51                   | 225                  |
| <b>23</b>  | 0000(+α)       | 12                   | 25                   | 6                    | 51                   | 249                  |
| <b>24</b>  | ---+-          | 5                    | 39                   | 3                    | 69                   | 210                  |
| <b>25</b>  | ---+-          | 5                    | 11                   | 10                   | 69                   | 210                  |
| <b>26</b>  | ++++-          | 20                   | 39                   | 10                   | 69                   | 210                  |
| <b>27</b>  | ---+-          | 20                   | 11                   | 3                    | 69                   | 210                  |
| <b>28</b>  | +++++          | 20                   | 11                   | 10                   | 69                   | 240                  |
| <b>29</b>  | ---++          | 5                    | 11                   | 3                    | 69                   | 240                  |
| <b>30</b>  | +++++          | 5                    | 39                   | 10                   | 69                   | 240                  |
| <b>31</b>  | ---++          | 20                   | 39                   | 3                    | 69                   | 240                  |
| <b>32</b>  | 000(+α)0       | 12                   | 25                   | 6                    | 80                   | 225                  |

**Table S3.** Second-order polynomial equation obtained for each target compound and model suitability parameters for the response functions.

| Compound                                                                       | R <sup>2</sup> | F-ratio | Prob > F | LOF Prob > F |
|--------------------------------------------------------------------------------|----------------|---------|----------|--------------|
| <b>D3</b><br>$y = 15586 + 1734x_2 - 5654x_4 + 2475x_5$                         | 0.94           | 0.492   | 0.0003   | 0.806        |
| <b>L3</b><br>$y = 16053 - 2083x_1 + 1128x_2 - 7803x_4$                         | 0.97           | 8.999   | <.0001   | 0.025        |
| <b>D4</b><br>$y = 34783 - 1762x_1 + 3441x_2 - 7568x_4 - 1951x_2^2 - 3282x_4^2$ | 0.93           | 0.823   | 0.0009   | 0.615        |
| <b>L4</b><br>$y = 27384 + 2151x_2 - 3358x_4 - 2893x_4^2$                       | 0.84           | 7.445   | 0.0347   | 0.035        |
| <b>D5</b><br>$y = 36532 + 3634x_2 - 2247x_2^2 - 2884x_4^2$                     | 0.81           | 6.139   | 0.0733   | 0.049        |
| <b>M4Q</b><br>$y = 13352 + 2247x_1 + 2032x_1^2$                                | 0.70           | 0.662   | 0.3533   | 0.703        |
| <b>L5</b><br>$y = 38081 + 2514x_1 + 3577x_2$                                   | 0.74           | 4.973   | 0.2135   | 0.070        |
| <b>D6</b><br>$y = 30897 + 3034x_2 - 2134x_2^2$                                 | 0.80           | 4.522   | 0.0986   | 0.082        |

**Table S4.** Results from the Student's t-test for the main, quadratic and interaction effects

|                       | Prob >  t |         |         |         |         |         |         |         |
|-----------------------|-----------|---------|---------|---------|---------|---------|---------|---------|
|                       | D3        | L3      | D4      | L4      | D5      | M4Q     | L5      | D6      |
| <b>Intercept</b>      | <0.0001   | <0.0001 | <0.0001 | <0.0001 | <0.0001 | <0.0001 | <0.0001 | <0.0001 |
| <b>X1</b>             | 0.097     | 0.002   | 0.091   | 0.875   | 0.857   | 0.023   | 0.057   | 0.117   |
| <b>X2</b>             | 0.011     | 0.048   | 0.004   | 0.028   | 0.004   | 0.826   | 0.011   | 0.003   |
| <b>X3</b>             | 0.405     | 0.998   | 0.438   | 0.721   | 0.718   | 0.842   | 0.751   | 0.855   |
| <b>X4</b>             | <0.0001   | <0.0001 | <0.0001 | 0.002   | 0.114   | 0.113   | 0.574   | 0.202   |
| <b>X5</b>             | 0.001     | 0.983   | 0.161   | 0.813   | 0.117   | 0.743   | 0.538   | 0.150   |
| <b>X1X2</b>           | 0.952     | 0.585   | 0.679   | 0.418   | 0.400   | 0.690   | 0.478   | 0.425   |
| <b>X1X3</b>           | 0.591     | 0.634   | 0.762   | 0.563   | 0.723   | 0.650   | 0.748   | 0.829   |
| <b>X2X3</b>           | 0.136     | 0.180   | 0.355   | 0.294   | 0.349   | 0.626   | 0.487   | 0.364   |
| <b>X1X4</b>           | 0.362     | 0.956   | 0.214   | 0.136   | 0.160   | 0.436   | 0.844   | 0.750   |
| <b>X2X4</b>           | 0.553     | 0.900   | 0.625   | 0.959   | 0.468   | 0.893   | 0.781   | 0.756   |
| <b>X3X4</b>           | 0.590     | 0.399   | 0.258   | 0.316   | 0.365   | 0.747   | 0.347   | 0.276   |
| <b>X1X5</b>           | 0.890     | 0.260   | 0.665   | 0.448   | 0.406   | 0.765   | 0.363   | 0.548   |
| <b>X2X5</b>           | 0.699     | 0.705   | 0.888   | 0.576   | 0.557   | 0.500   | 0.498   | 0.245   |
| <b>X3X5</b>           | 0.903     | 0.864   | 0.652   | 0.301   | 0.311   | 0.332   | 0.318   | 0.164   |
| <b>X4X5</b>           | 0.955     | 0.133   | 0.933   | 0.210   | 0.335   | 0.858   | 0.237   | 0.211   |
| <b>X1<sup>2</sup></b> | 0.695     | 0.270   | 0.169   | 0.144   | 0.131   | 0.045   | 0.231   | 0.209   |
| <b>X2<sup>2</sup></b> | 0.732     | 0.946   | 0.075   | 0.191   | 0.054   | 0.109   | 0.124   | 0.025   |
| <b>X3<sup>2</sup></b> | 0.785     | 0.541   | 0.842   | 0.922   | 1.000   | 0.917   | 0.737   | 0.766   |
| <b>X4<sup>2</sup></b> | 0.376     | 0.254   | 0.007   | 0.007   | 0.018   | 0.340   | 0.190   | 0.111   |
| <b>X5<sup>2</sup></b> | 0.779     | 0.804   | 0.502   | 0.432   | 0.476   | 0.752   | 0.522   | 0.745   |

Blue – Prob > |t| below 0.05

Light Blue – Prob > |t| below 0.01

**Table S5.** Additional testing to prove the applicability of the proposed empirical model

| <b>A</b><br><i>(Pattern: (-a) (-a) (-a)<br/>(-a) (-a))</i> |             |            |                       |            | <b>B</b><br><i>(Pattern: (-a)++-+)</i> |            |                       |            | <b>C</b><br><i>(Pattern: ++(-a)-+)</i> |            |                       |            |
|------------------------------------------------------------|-------------|------------|-----------------------|------------|----------------------------------------|------------|-----------------------|------------|----------------------------------------|------------|-----------------------|------------|
|                                                            | <b>Area</b> | <b>±SD</b> | <b>Area<br/>Pred.</b> | <b>±SD</b> | <b>Area</b>                            | <b>±SD</b> | <b>Area<br/>Pred.</b> | <b>±SD</b> | <b>Area</b>                            | <b>±SD</b> | <b>Area<br/>Pred.</b> | <b>±SD</b> |
| <b>D3</b>                                                  | 17262       | 1252       | 26048                 | 11778      | 25804                                  | 3928       | 27427                 | 6304       | 24072                                  | 870        | 25331                 | 6320       |
| <b>L3</b>                                                  | 18363       | 1150       | 32056                 | 10488      | 28472                                  | 2306       | 29690                 | 5614       | 25959                                  | 2592       | 25425                 | 5628       |
| <b>D4</b>                                                  | 20708       | 1515       | 34806                 | 19667      | 41941                                  | 4294       | 48279                 | 10526      | 42032                                  | 2319       | 48155                 | 10553      |
| <b>L4</b>                                                  | 15259       | 1483       | 23147                 | 17575      | 25282                                  | 3490       | 32171                 | 9407       | 33625                                  | 3446       | 31926                 | 9431       |
| <b>D5</b>                                                  | 16554       | 1187       | 27017                 | 20679      | 33931                                  | 5102       | 41404                 | 11023      | 39518                                  | 3933       | 41067                 | 11096      |
| <b>M4Q</b>                                                 | 2243        | 914        | 15521                 | 17662      | 6163                                   | 998        | 11987                 | 9454       | 12941                                  | 414        | 16887                 | 9477       |
| <b>L5</b>                                                  | 11983       | 527        | 28646                 | 24448      | 21688                                  | 4745       | 37222                 | 13086      | 44364                                  | 5197       | 40263                 | 13118      |
| <b>D6</b>                                                  | 8410        | 318        | 21282                 | 16294      | 21678                                  | 3077       | 33773                 | 8721       | 34266                                  | 4076       | 31788                 | 8743       |

| <b>D</b><br><i>(Pattern: +0+-+)</i> |             |            |                       |            | <b>E</b><br><i>(Pattern: (+a) (+a) (+a)<br/>(+a) (+a))</i> |            |                       |            |
|-------------------------------------|-------------|------------|-----------------------|------------|------------------------------------------------------------|------------|-----------------------|------------|
|                                     | <b>Area</b> | <b>±SD</b> | <b>Area<br/>Pred.</b> | <b>±SD</b> | <b>Area</b>                                                | <b>±SD</b> | <b>Area<br/>Pred.</b> | <b>±SD</b> |
| <b>D3</b>                           | 24225       | 3326       | 23475                 | 4052       | 17986                                                      | 1304       | 14047                 | 11778      |
| <b>L3</b>                           | 25819       | 2791       | 22775                 | 3609       | 2795                                                       | 304        | 1500                  | 10488      |
| <b>D4</b>                           | 40009       | 2593       | 40242                 | 6768       | 25900                                                      | 1068       | 14299                 | 19667      |
| <b>L4</b>                           | 31807       | 3398       | 31277                 | 6048       | 11886                                                      | 351        | 14799                 | 17575      |
| <b>D5</b>                           | 39584       | 5264       | 40796                 | 7116       | 32985                                                      | 105        | 32215                 | 20679      |
| <b>M4Q</b>                          | 11834       | 2897       | 19058                 | 6078       | 14146                                                      | 43         | 16352                 | 17662      |
| <b>L5</b>                           | 40281       | 7298       | 40503                 | 8413       | 35961                                                      | 754        | 43107                 | 24448      |
| <b>D6</b>                           | 32088       | 6804       | 34212                 | 5607       | 34523                                                      | 1809       | 39860                 | 16294      |

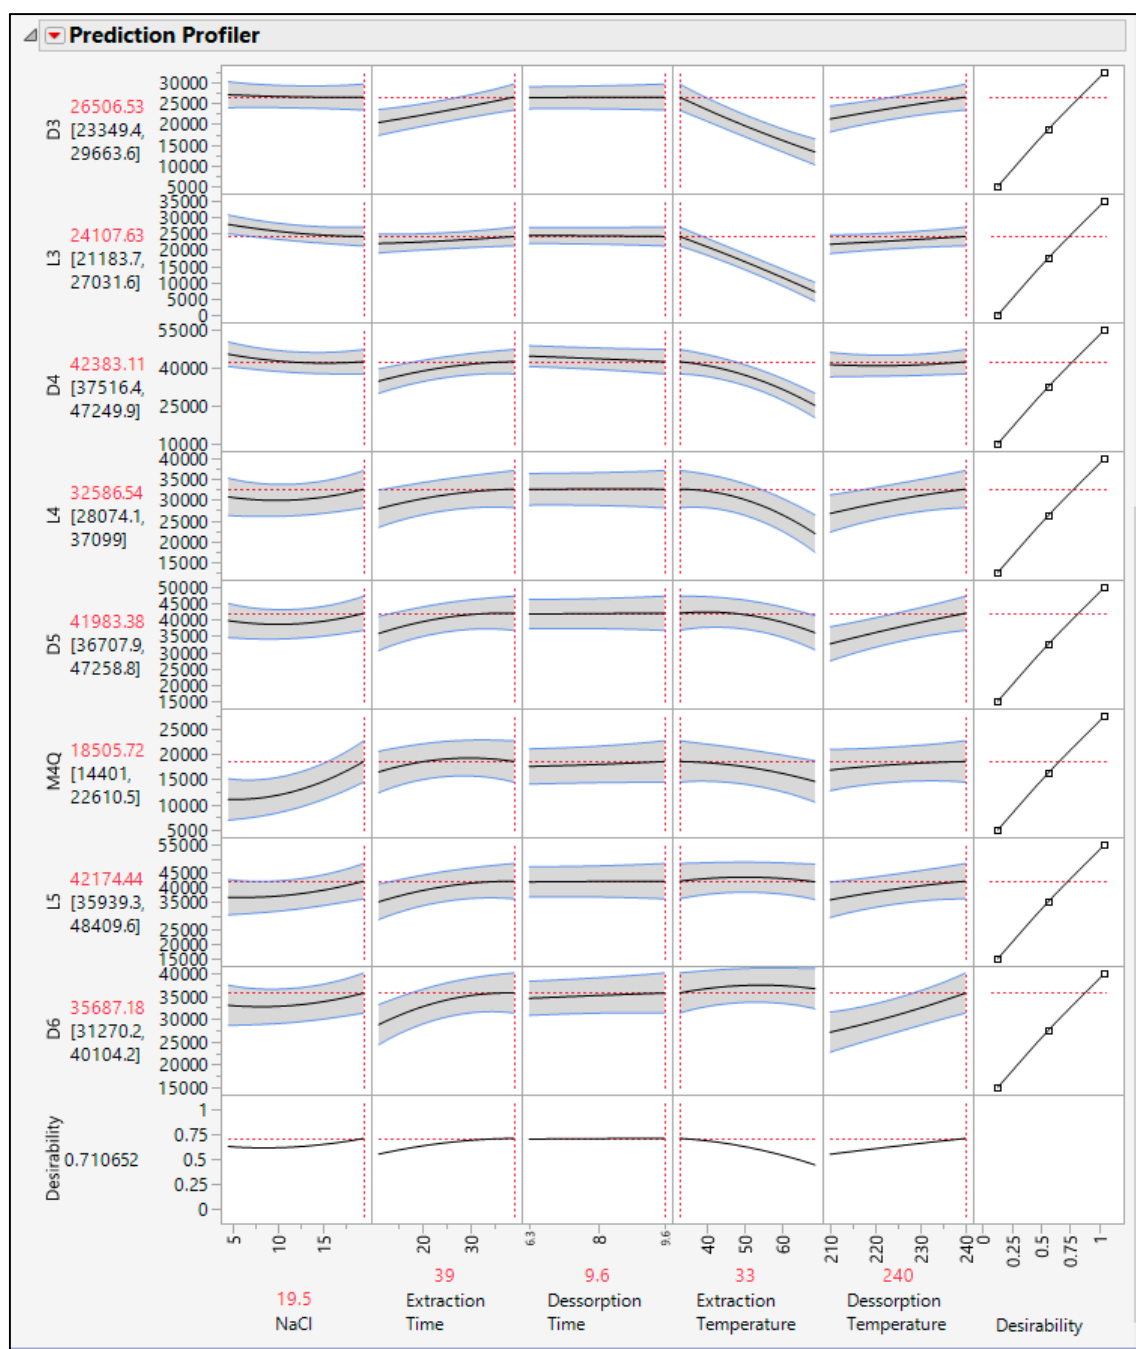

**Figure S1.** Optimal conditions and desirability function

**(A)**

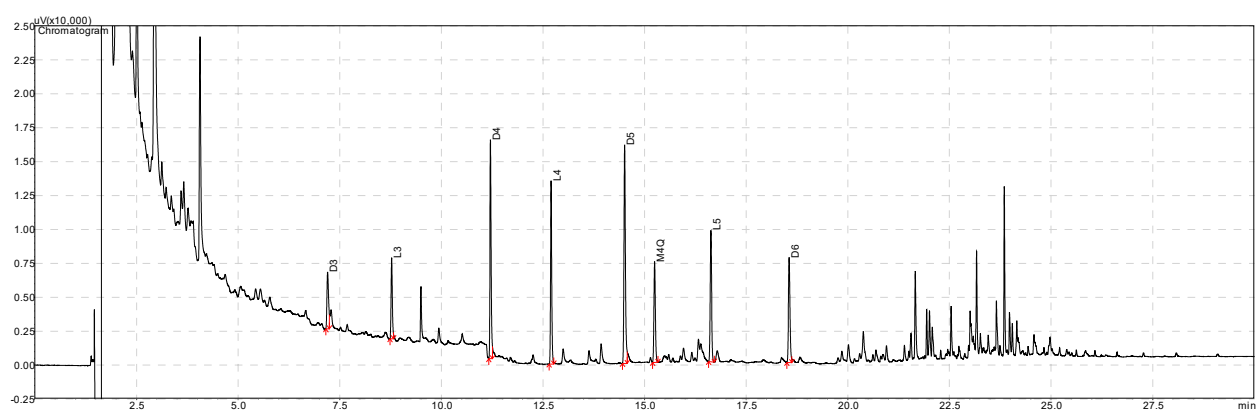

**(B)**

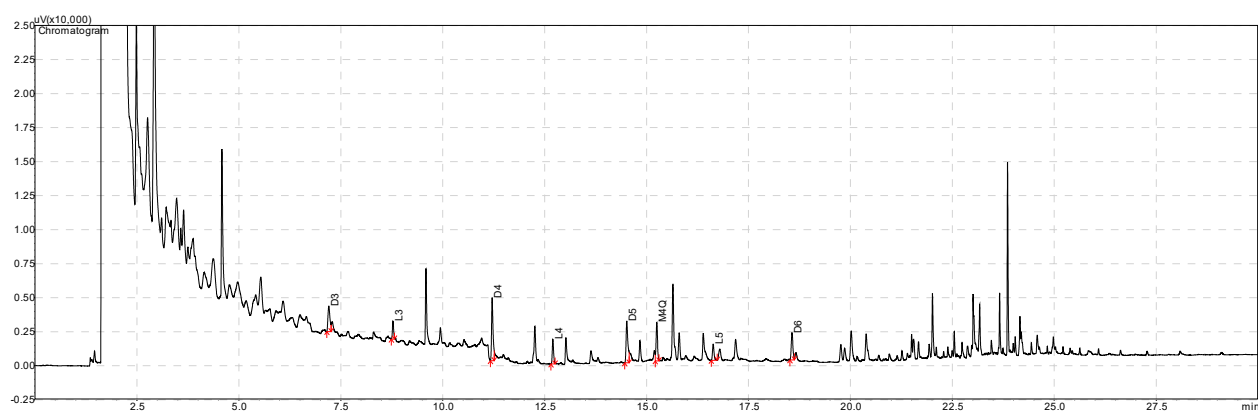

**Figure S2.** Chromatogram of a 3 µg L<sup>-1</sup> calibration standard (A) and wastewater sample (B).
